# Supplementary material
Source: PubMed Central journal article supplement (PMC3182703)
Supplement: 1101996108_pnas.1101996108_SI.pdf [file 1101996108_pnas.1101996108_SI.pdf]

# Supporting Information

Saragosti et al. 10.1073/pnas.1101996108

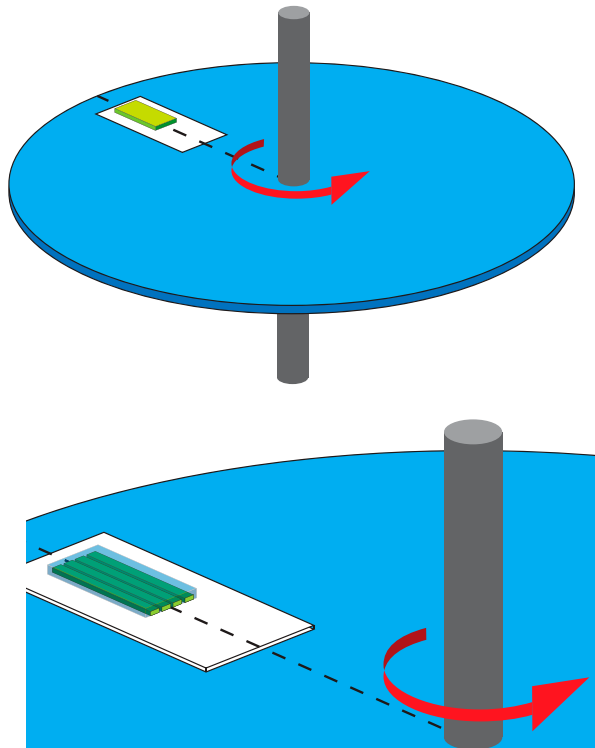

**Fig. S1.** Centrifugation set-up. The array of microchannels is aligned with a radius of the spin-coater and positioned at ca. 9 cm from the rotation axis. Typical rotation velocity was 750 rpm (corresponding to 65 g).

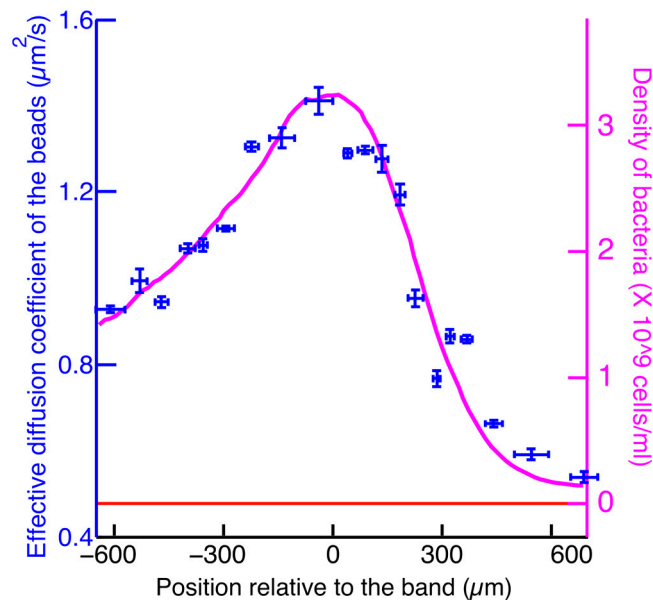

**Fig. S2.** Hydrodynamic contribution: Tracking of passive markers. Blue points: Coefficients of diffusion of 1  $\mu\text{m}$  polystyrene micro beads as a function of their position in the bacterial wave. The concentration profile is superimposed (purple line). The values are obtained by fitting the mean square displacements calculated over the beads contained in each bin. The red line indicates the theoretical value of  $0.44 \mu\text{m}^2/\text{s}$  expected for 1  $\mu\text{m}$  beads in the absence of bacteria. These diffusion coefficients are proportional to the local bacteria concentration. If the migrating population of bacteria did not induce a drift of the beads, it clearly enhanced diffusion. This effect would promote the dispersion of the traveling band and the bacterial waves have to overcome this additional agitation to last.
